# Supplementary material
Source: Springer Nature journal article supplement (https://www.springermedizin.de/resource/supplementary/12943_2012_1199_MOESM9_ESM.pdf/9552378)

**A**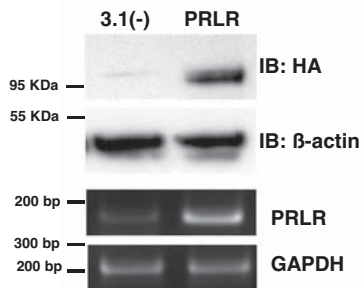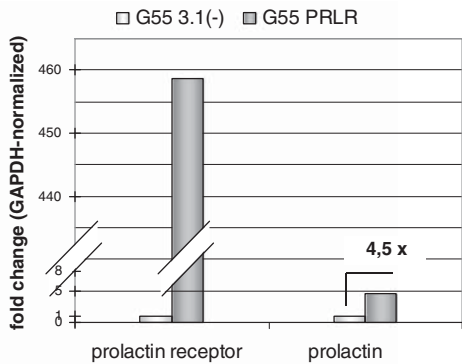**B**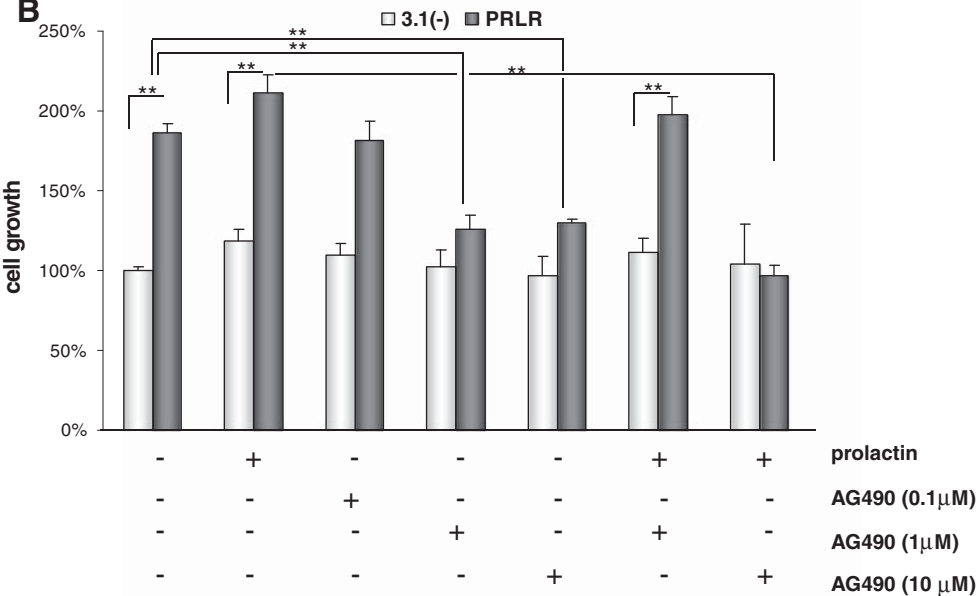**C**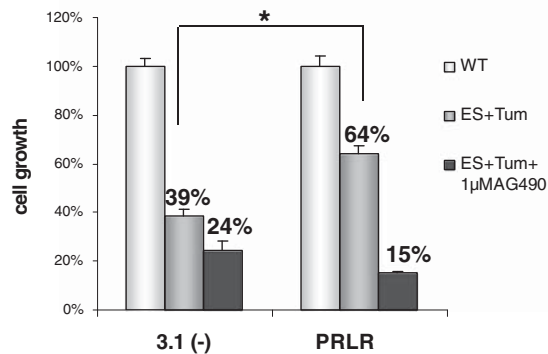

Supplement: MOESM9 [file 9552378]
